# Supplementary material
Source: PubMed Central journal article supplement (PMC129455)
Supplement: pnas_182380799_3.pdf [file pnas_182380799_3.pdf]

**Table 2. *S. agalactiae* predicted and experimentally characterized surface and secreted proteins**

| ORF     | Size, aa | Signal peptide | Sortase motif | Lipo-protein | Other | Western blot | FACS | GBS specific | Annotation                                                        |
|---------|----------|----------------|---------------|--------------|-------|--------------|------|--------------|-------------------------------------------------------------------|
| SAG0017 | 447      | +              |               |              |       |              |      |              | pcsB                                                              |
| SAG0031 | 299      | +              |               |              |       |              |      |              | peptidase, M23/M37 family                                         |
| SAG0032 | 434      | +              |               |              |       | +            | +    |              | group B streptococcal surface immunogenic protein                 |
| SAG0034 | 438      | +              |               | +            |       | +            | +    |              | sugar ABC transporter, sugar-binding protein                      |
| SAG0051 | 126      | +              |               |              |       | +            | +    |              | MORN motif family protein                                         |
| SAG0079 | 212      |                |               |              | +     | +            | +    |              | adenylate kinase                                                  |
| SAG0086 | 85       |                |               | +            |       |              |      | +            | lipoprotein, putative                                             |
| SAG0093 | 250      | +              |               |              |       | +            | +    |              | D-alanyl-D-alanine carboxypeptidase family protein                |
| SAG0094 | 191      | +              |               |              |       |              |      |              | <i>N</i> -acetylmuramoyl-L-alanine amidase, family 4 protein      |
| SAG0108 | 308      | +              |               |              |       |              |      |              | conserved hypothetical protein                                    |
| SAG0114 | 322      | +              |               | +            |       |              |      |              | ribose ABC transporter, periplasmic D-ribose-binding protein      |
| SAG0124 | 356      | +              |               |              |       |              |      |              | sensor histidine kinase                                           |
| SAG0132 | 294      | +              |               |              |       | +            | +    |              | SPFH domain/Band 7 family protein                                 |
| SAG0134 | 96       | +              |               |              |       |              |      | +            | hypothetical protein                                              |
| SAG0146 | 395      | +              |               |              |       |              |      |              | penicillin-binding protein 4, putative                            |
| SAG0147 | 411      | +              |               |              |       |              |      |              | D-alanyl-D-alanine carboxypeptidase family protein                |
| SAG0148 | 551      |                |               | +            |       | +            | -    |              | oligopeptide ABC transporter, substrate-binding protein, putative |
| SAG0166 | 123      | +              |               |              |       |              |      |              | conserved domain protein                                          |
| SAG0176 | 94       | +              |               |              |       |              |      |              | conserved hypothetical protein                                    |
| SAG0187 | 542      | +              |               | +            |       | +            | +    |              | oligopeptide ABC transporter, oligopeptide-binding protein        |
| SAG0206 | 60       |                |               | +            |       |              |      | +            | lipoprotein, putative                                             |
| SAG0213 | 39       | +              |               |              |       |              |      | +            | hypothetical protein                                              |
| SAG0231 | 135      | +              |               |              |       |              |      |              | hypothetical protein                                              |
| SAG0242 | 308      |                |               | +            |       | +            | -    |              | amino acid ABC transporter, amino acid-binding protein            |
| SAG0245 | 152      |                |               | +            |       | +            | -    | +            | protein of unknown function/lipoprotein, putative                 |
| SAG0255 | 315      | +              |               |              |       |              |      |              | conserved hypothetical protein                                    |
| SAG0257 | 53       |                |               | +            |       |              |      | +            | lipoprotein, putative                                             |
| SAG0265 | 235      | +              |               |              |       | +            | -    | +            | conserved hypothetical protein                                    |
| SAG0290 | 270      | +              |               |              |       | +            | +    |              | ABC transporter, substrate-binding protein                        |
| SAG0298 | 750      | +              |               |              |       |              |      |              | penicillin-binding protein 1A                                     |
| SAG0306 | 535      | +              |               |              |       |              |      |              | KH domain protein                                                 |
| SAG0321 | 339      | +              |               |              |       |              |      |              | sensor histidine kinase, putative                                 |
| SAG0329 | 106      | +              |               |              |       |              |      |              | PTS system, cellobiose-specific IIB component                     |
| SAG0368 | 435      | +              |               |              |       | +            | +    |              | protein of unknown function                                       |
| SAG0371 | 167      | +              |               |              |       |              |      | +            | hypothetical protein                                              |
| SAG0383 | 334      | +              |               | +            |       | +            | -    |              | protein of unknown function/lipoprotein, putative                 |
| SAG0392 | 521      | +              | +             |              |       | +            | +    |              | cell wall surface anchor family protein                           |
| SAG0394 | 345      |                |               |              | +     |              |      |              | sensor histidine kinase                                           |
| SAG0405 | 347      | +              |               | +            |       | +            | +    |              | protein of unknown function/lipoprotein, putative                 |
| SAG0406 | 299      | +              |               |              |       |              |      |              | UTP-glucose-1-phosphate uridylyltransferase                       |
| SAG0407 | 338      | +              |               |              |       |              |      |              | glycerol-3-phosphate dehydrogenase (NAD(P)+)                      |
| SAG0416 | 1233     | +              | +             |              |       | +            | +    |              | protease, putative                                                |
| SAG0421 | 1055     |                | +             |              |       | +            | -    |              | cell wall surface anchor family protein                           |
| SAG0433 | 1389     |                | +             |              |       |              |      |              | surface protein Rib                                               |
| SAG0437 | 123      |                |               | +            |       |              |      |              | lipoprotein, putative                                             |
| SAG0451 | 149      | +              |               | +            |       |              |      | +            | bacteriocin transport accessory protein, putative                 |
| SAG0455 | 357      | +              |               |              |       |              |      |              | conserved hypothetical protein                                    |
| SAG0472 | 126      | +              |               |              |       | +            | -    |              | rhodanese-like family protein                                     |
| SAG0482 | 84       | +              |               |              |       |              |      |              | YGGT family protein                                               |
| SAG0499 | 275      |                |               |              | +     |              |      |              | hemolysin A                                                       |
| SAG0503 | 279      | +              |               |              |       | +            | +    |              | lipase/acylhydrolase                                              |
| SAG0504 | 200      | +              |               |              |       |              |      |              | conserved hypothetical protein                                    |
| SAG0506 | 65       | +              |               |              |       |              |      | +            | hypothetical protein                                              |
| SAG0521 | 236      | +              |               |              |       |              |      |              | carboxymethylenebutenolidase-related protein                      |
| SAG0535 | 506      | +              |               |              |       | +            | +    |              | zinc ABC transporter, zinc-binding adhesion lipoprotein           |
| SAG0596 | 670      |                |               |              | +     |              |      |              | prophage LambdaSa1, pblA protein, internal deletion               |
| SAG0603 | 111      |                |               |              | +     |              |      |              | conserved hypothetical protein                                    |
| SAG0604 | 239      |                |               |              | +     |              |      |              | prophage LambdaSa1, lysin, putative                               |

| ORF     | Size, aa | Signal peptide | Sortase motif | Lipo-protein | Other | Western blot | FACS | GBS specific | Annotation                                                                 |
|---------|----------|----------------|---------------|--------------|-------|--------------|------|--------------|----------------------------------------------------------------------------|
| SAG0617 | 439      |                |               |              | +     |              |      |              | sensor histidine kinase VncS                                               |
| SAG0624 | 574      | +              |               |              |       |              |      |              | septation ring formation regulator EzrA, putative                          |
| SAG0629 | 354      | +              |               |              |       |              |      |              | conserved domain protein                                                   |
| SAG0635 | 245      | +              |               |              |       | +            | -    |              | acid phosphatase, class B                                                  |
| SAG0638 | 109      | +              |               |              |       |              |      |              | cell wall surface anchor family protein, interruption-N                    |
| SAG0645 | 554      |                | +             |              |       | +            | +    |              | cell wall surface anchor family protein                                    |
| SAG0646 | 307      | +              | +             |              |       | +            | -    |              | cell wall surface anchor family protein                                    |
| SAG0647 | 305      | +              |               |              |       |              |      |              | sortase family protein                                                     |
| SAG0649 | 890      |                | +             |              |       | +            | +    |              | cell wall surface anchor family protein, putative                          |
| SAG0658 | 383      | +              |               | +            |       |              |      |              | lipoprotein, putative                                                      |
| SAG0675 | 171      | +              |               |              |       |              |      |              | putative secreted protein                                                  |
| SAG0676 | 885      |                |               |              | +     |              |      |              | proteinase, putative                                                       |
| SAG0677 | 1062     |                | +             |              |       |              |      |              | hypothetical protein                                                       |
| SAG0679 | 343      | +              |               | +            |       | +            | -    |              | protein of unknown function                                                |
| SAG0680 | 339      | +              |               |              |       | +            | -    |              | protein of unknown function                                                |
| SAG0681 | 353      | +              |               |              |       |              |      |              | conserved domain protein                                                   |
| SAG0686 | 261      | +              |               |              |       | +            | +    |              | DNA-entry nuclease, putative                                               |
| SAG0714 | 188      | +              |               |              |       |              |      | +            | conserved hypothetical protein                                             |
| SAG0717 | 266      | +              |               |              |       | +            | +    |              | amino acid ABC transporter, amino acid-binding protein                     |
| SAG0720 | 449      |                |               |              | +     |              |      |              | sensory box histidine kinase                                               |
| SAG0738 | 132      | +              |               |              |       |              |      |              | conserved hypothetical protein                                             |
| SAG0739 | 143      | +              |               |              |       |              |      |              | conserved hypothetical protein                                             |
| SAG0742 | 428      |                |               |              | +     | +            | +    |              | peptidase, U32 family                                                      |
| SAG0755 | 282      | +              |               |              |       |              |      |              | peptidase, U32 family                                                      |
| SAG0757 | 129      | +              |               | +            |       | +            | -    |              | protein of unknown function/lipoprotein, putative                          |
| SAG0764 | 230      |                |               |              | +     | +            | +    |              | phosphoglycerate mutase family protein                                     |
| SAG0765 | 681      | +              |               |              |       |              |      |              | penicillin-binding protein 2b                                              |
| SAG0771 | 512      | +              | +             |              |       | +            | +    | +            | cell wall surface anchor family protein                                    |
| SAG0776 | 276      | +              |               | +            |       |              |      |              | YaeC family protein, putative                                              |
| SAG0777 | 528      |                |               |              | +     | +            | +    |              | ATP-dependent RNA helicase, DEAD/DEAH box family                           |
| SAG0785 | 330      | +              |               |              |       |              |      |              | conserved hypothetical protein                                             |
| SAG0808 | 309      | +              |               | +            |       | +            | +    |              | protease maturation protein, putative                                      |
| SAG0824 | 417      | +              |               |              |       |              |      |              | polysaccharide deacetylase family protein                                  |
| SAG0832 | 753      | +              |               |              |       | +            | +    |              | protein of unknown function                                                |
| SAG0833 | 181      | +              |               |              |       |              |      | +            | hypothetical protein                                                       |
| SAG0867 | 63       | +              |               |              |       |              |      |              | conserved hypothetical protein                                             |
| SAG0868 | 285      | +              |               |              |       | +            | -    |              | DNA-entry nuclease                                                         |
| SAG0886 | 319      | +              |               |              |       | +            | +    |              | protein of unknown function                                                |
| SAG0904 | 56       | +              |               |              |       |              |      | +            | hypothetical protein                                                       |
| SAG0907 | 877      | +              |               | +            |       | +            | -    |              | protein of unknown function/lipoprotein, putative                          |
| SAG0926 | 333      | +              |               |              |       |              |      |              | Tn916, NLP/P60 family protein                                              |
| SAG0942 | 185      | +              |               |              |       | +            | +    |              | signal peptidase I, putative                                               |
| SAG0949 | 276      | +              |               | +            |       | +            | +    |              | amino acid ABC transporter, amino acid-binding protein                     |
| SAG0954 | 349      |                |               | +            |       | +            | -    |              | protein of unknown function/lipoprotein, putative                          |
| SAG0961 | 247      | +              |               |              |       | +            | -    |              | sortase SrtA                                                               |
| SAG0963 | 320      | +              |               |              |       |              |      |              | conserved hypothetical protein                                             |
| SAG0971 | 282      | +              |               | +            |       | +            | -    |              | protein of unknown function/lipoprotein, putative                          |
| SAG0973 | 320      | +              |               |              |       |              |      | +            | nisin-resistance protein, putative                                         |
| SAG0977 | 312      |                |               |              | +     |              |      |              | sensor histidine kinase                                                    |
| SAG0979 | 553      | +              |               | +            |       | +            | -    |              | ABC transporter, substrate-binding protein                                 |
| SAG0984 | 437      | +              |               |              |       |              |      |              | sensor histidine kinase CiaH                                               |
| SAG0992 | 286      | +              |               | +            |       | +            | +    |              | phosphate ABC transporter, phosphate-binding protein                       |
| SAG1007 | 342      | +              |               | +            |       | +            | -    |              | iron-compound ABC transporter, iron-compound-binding protein               |
| SAG1014 | 190      | +              |               |              |       | -            | -    |              | conserved hypothetical protein                                             |
| SAG1018 | 40       |                |               | +            |       |              |      | +            | lipoprotein, putative                                                      |
| SAG1024 | 183      | +              |               | +            |       |              |      |              | lipoprotein, putative                                                      |
| SAG1029 | 101      | +              |               |              |       |              |      |              | hypothetical protein                                                       |
| SAG1030 | 304      | +              |               |              |       | +            | +    |              | protein of unknown function                                                |
| SAG1037 | 157      | +              |               |              |       |              |      | +            | hypothetical protein                                                       |
| SAG1052 | 47       |                | +             |              |       |              |      | +            | cell wall surface anchor family protein, putative                          |
| SAG1072 | 200      | +              |               |              |       |              |      |              | conserved hypothetical protein                                             |
| SAG1094 | 278      |                |               |              | +     | +            | +    |              | conserved hypothetical protein                                             |
| SAG1108 | 357      | +              |               |              |       | +            | -    |              | spermidine/putrescine ABC transporter, spermidine/putrescine-binding prot. |
| SAG1121 | 295      | +              |               |              |       |              |      |              | polysaccharide deacetylase family protein                                  |
| SAG1126 | 228      | +              |               |              |       | +            | +    |              | protein of unknown function                                                |
| SAG1127 | 446      | +              |               |              |       |              |      | +            | conserved domain protein                                                   |
| SAG1130 | 49       | +              |               |              |       |              |      | +            | hypothetical protein                                                       |
| SAG1138 | 64       | +              |               |              |       |              |      |              | conserved hypothetical protein                                             |

| ORF     | Size, aa | Signal peptide | Sortase motif | Lipo-protein | Other | Western blot | FACS | GBS specific | Annotation                                                                 |
|---------|----------|----------------|---------------|--------------|-------|--------------|------|--------------|----------------------------------------------------------------------------|
| SAG1139 | 193      | +              |               |              |       |              |      |              | conserved hypothetical protein                                             |
| SAG1149 | 207      | +              |               | +            |       |              |      |              | lipoprotein, putative                                                      |
| SAG1184 | 236      | +              |               |              |       |              |      |              | conserved hypothetical protein                                             |
| SAG1186 | 553      |                |               |              | +     |              |      |              | metallo-beta-lactamase superfamily protein                                 |
| SAG1189 | 334      | +              |               |              |       |              |      |              | conserved hypothetical protein                                             |
| SAG1190 | 551      |                |               |              | +     |              |      |              | adherence and virulence protein A                                          |
| SAG1197 | 1072     | +              |               |              |       |              |      |              | hyaluronidase                                                              |
| SAG1201 | 367      | +              |               |              |       |              |      |              | iminodiacetate oxidase, putative                                           |
| SAG1206 | 854      | +              |               |              |       |              |      |              | conserved domain protein                                                   |
| SAG1214 | 58       | +              |               |              |       |              |      |              | hypothetical protein                                                       |
| SAG1216 | 1252     |                | +             |              |       | +            | -    |              | pullulanase, putative                                                      |
| SAG1227 | 198      | +              |               |              |       | +            | -    |              | protein of unknown function                                                |
| SAG1233 | 822      | +              |               |              |       | +            | -    |              | streptococcal histidine triad family protein                               |
| SAG1234 | 306      | +              |               | +            |       | +            | +    |              | laminin-binding surface protein                                            |
| SAG1238 | 202      | +              |               |              |       |              |      |              | hypothetical protein                                                       |
| SAG1283 | 1631     |                | +             |              |       | +            | +    |              | agglutinin receptor                                                        |
| SAG1313 | 56       | +              |               |              |       |              |      |              | conserved hypothetical protein                                             |
| SAG1327 | 409      | +              |               |              |       |              |      |              | sensor histidine kinase                                                    |
| SAG1331 | 979      | +              | +             |              |       | +            | +    |              | R5 protein                                                                 |
| SAG1333 | 690      | +              | +             |              |       | +            | +    |              | 5'-nucleotidase family protein                                             |
| SAG1350 | 544      | +              |               |              |       |              |      |              | surface antigen-related protein                                            |
| SAG1361 | 414      | +              |               |              |       |              |      |              | conserved hypothetical protein                                             |
| SAG1371 | 392      | +              |               |              |       |              |      |              | conserved hypothetical protein                                             |
| SAG1393 | 310      |                |               | +            |       |              |      |              | iron compound ABC transporter, substrate-binding protein                   |
| SAG1404 | 308      | +              | +             |              |       | +            | -    |              | cell wall surface anchor family protein                                    |
| SAG1405 | 294      | +              |               |              | +     | +            | +    |              | sortase family protein                                                     |
| SAG1406 | 293      | +              |               |              |       |              |      |              | sortase family protein                                                     |
| SAG1407 | 705      | +              | +             |              |       | +            | +    |              | cell wall surface anchor family protein                                    |
| SAG1408 | 901      |                | +             |              |       |              |      |              | cell wall surface anchor family protein                                    |
| SAG1419 | 577      |                |               | +            |       |              |      | +            | lipoprotein, putative                                                      |
| SAG1431 | 268      |                |               | +            |       |              |      |              | amino acid ABC transporter, amino acid-binding protein                     |
| SAG1433 | 375      | +              |               |              |       |              |      |              | conserved hypothetical protein                                             |
| SAG1441 | 415      | +              |               |              |       | +            | +    |              | maltose/maltodextrin ABC transporter, maltose/maltodextrin-binding protein |
| SAG1462 | 970      |                | +             |              |       |              |      |              | cell wall surface anchor family protein                                    |
| SAG1473 | 192      | +              | +             |              |       |              |      | +            | cell wall surface anchor family protein                                    |
| SAG1474 | 680      | +              | +             |              |       |              |      |              | amidase family protein                                                     |
| SAG1483 | 78       | +              |               |              |       |              |      |              | preprotein translocase, SecG subunit                                       |
| SAG1488 | 195      | +              |               |              |       | +            | +    |              | dephospho-CoA kinase                                                       |
| SAG1491 | 530      | +              |               |              |       |              |      | +            | hypothetical protein                                                       |
| SAG1508 | 590      |                |               |              | +     | +            | -    |              | 67 kDa Myosin-crossreactive streptococcal antigen                          |
| SAG1518 | 538      | +              |               | +            |       |              |      |              | peptide ABC transporter, peptide-binding protein                           |
| SAG1530 | 267      | +              |               | +            |       | +            | -    |              | peptidyl-prolyl cis-trans isomerase, cyclophilin-type                      |
| SAG1533 | 308      | +              |               | +            |       | +            | -    |              | manganese ABC transporter, manganese-binding adhesion lipotein             |
| SAG1544 | 232      | +              |               |              |       |              |      |              | gluconate 5-dehydrogenase, putative                                        |
| SAG1551 | 67       | +              |               |              |       |              |      | +            | hypothetical protein                                                       |
| SAG1552 | 719      | +              |               |              |       |              |      |              | conserved hypothetical protein                                             |
| SAG1553 | 477      | +              |               |              |       |              |      | +            | hypothetical protein                                                       |
| SAG1562 | 280      | +              |               |              |       |              |      |              | conserved hypothetical protein                                             |
| SAG1582 | 388      | +              |               | +            |       | +            | -    |              | branched-chain amino acid ABC transporter, amino acid-binding protein      |
| SAG1590 | 449      |                |               |              | +     | +            | +    |              | potassium uptake protein, Trk family                                       |
| SAG1601 | 79       | +              |               |              |       |              |      |              | conserved hypothetical protein                                             |
| SAG1610 | 285      |                |               | +            |       | +            | -    |              | amino acid ABC transporter, substrate-binding protein                      |
| SAG1618 | 1032     |                |               |              | +     | +            | +    |              | Snf2 family protein                                                        |
| SAG1624 | 501      | +              |               |              |       |              |      |              | sensor histidine kinase CsrS                                               |
| SAG1628 | 184      | +              |               |              |       |              |      |              | lemA protein                                                               |
| SAG1631 | 223      | +              |               |              |       | +            | -    |              | potassium uptake protein, Trk family, putative                             |
| SAG1641 | 274      | +              |               |              |       | +            | -    |              | YaeC family protein                                                        |
| SAG1642 | 277      | +              |               | +            |       | +            | -    |              | ABC transporter, substrate-binding protein                                 |
| SAG1683 | 512      | +              |               |              |       |              |      |              | immunogenic secreted protein, putative                                     |
| SAG1706 | 238      | +              |               |              |       |              |      |              | conserved hypothetical protein                                             |
| SAG1745 | 148      | +              |               |              |       |              |      | +            | hypothetical protein                                                       |
| SAG1752 | 390      | +              |               |              |       |              |      |              | conserved hypothetical protein TIGR00275                                   |
| SAG1759 | 230      |                |               |              | +     | +            | +    |              | protein of unknown function                                                |
| SAG1762 | 169      | +              |               |              |       |              |      |              | conserved hypothetical protein                                             |
| SAG1767 | 289      | +              |               | +            |       |              |      |              | acid phosphatase                                                           |
| SAG1768 | 336      |                |               |              | +     | +            | +    |              | glyceraldehyde 3-phosphate dehydrogenase                                   |
| SAG1774 | 424      | +              |               |              |       |              |      |              | conserved hypothetical protein                                             |
| SAG1786 | 130      | +              |               |              |       | +            | -    |              | protein of unknown function                                                |

| ORF     | Size, aa | Signal peptide | Sortase motif | Lipo-protein | Other | Western blot | FACS | GBS specific | Annotation                                                     |
|---------|----------|----------------|---------------|--------------|-------|--------------|------|--------------|----------------------------------------------------------------|
| SAG1787 | 420      | +              |               |              |       |              |      |              | dltD protein                                                   |
| SAG1791 | 395      | +              |               |              |       |              |      |              | sensor histidine kinase                                        |
| SAG1822 | 272      | +              |               |              |       | +            | -    |              | protein of unknown function                                    |
| SAG1823 | 418      |                |               |              |       | +            | +    |              | protein of unknown function                                    |
| SAG1837 | 468      |                |               |              | +     |              |      |              | prophage LambdaSa2, lysin, putative                            |
| SAG1838 | 109      | +              |               |              |       |              |      |              | prophage LambdaSa2, holin, putative                            |
| SAG1839 | 136      | +              |               |              |       |              |      |              | conserved hypothetical protein                                 |
| SAG1842 | 1224     |                |               |              | +     |              |      |              | prophage LambdaSa2, PblB, putative                             |
| SAG1912 | 194      | +              |               |              |       |              |      |              | <i>N</i> -acetylmuramoyl-L-alanine amidase, family 4 protein   |
| SAG1921 | 508      | +              |               |              |       |              |      |              | sensor histidine kinase                                        |
| SAG1932 | 816      | +              |               |              |       |              |      |              | neuraminidase-related protein                                  |
| SAG1938 | 307      | +              |               | +            |       | +            | -    |              | adhesion lipoprotein                                           |
| SAG1941 | 800      | +              | +             |              |       | +            | -    |              | 2',3'-cyclic-nucleotide 2'-phosphodiesterase                   |
| SAG1945 | 345      | +              |               |              |       |              |      |              | iron ABC transporter, iron-binding protein                     |
| SAG1947 | 549      |                |               |              | +     |              |      |              | conserved hypothetical protein                                 |
| SAG1960 | 551      |                |               |              | +     | +            | +    |              | sensor histidine kinase                                        |
| SAG1966 | 293      |                |               | +            |       | +            | -    |              | hemolysin precursor, putative                                  |
| SAG1996 | 263      | +              | +             |              |       |              |      |              | cell wall surface anchor family protein, putative              |
| SAG1997 | 182      | +              |               |              |       |              |      |              | hypothetical protein                                           |
| SAG1998 | 457      | +              |               |              |       |              |      |              | hypothetical protein                                           |
| SAG2021 | 826      |                | +             |              |       |              |      |              | cell wall surface anchor family protein                        |
| SAG2043 | 255      | +              |               |              |       |              |      |              | cAMP factor                                                    |
| SAG2053 | 1570     | +              | +             |              |       |              |      |              | serine protease, subtilase family, putative                    |
| SAG2055 | 462      |                |               |              | +     |              |      |              | sensor histidine kinase                                        |
| SAG2056 | 202      | +              |               |              |       |              |      | +            | chromosome assembly-related protein                            |
| SAG2063 | 630      | +              | +             |              |       |              |      |              | pathogenicity protein, putative                                |
| SAG2078 | 320      | +              |               | +            |       | +            | -    |              | protein of unknown function/lipoprotein, putative              |
| SAG2094 |          | +              |               |              |       | +            | +    |              | competence/damage-inducible protein CinA, authentic frameshift |
| SAG2121 | 223      | +              |               |              |       |              |      | +            | hypothetical protein                                           |
| SAG2123 | 454      | +              |               |              |       |              |      |              | sensor histidine kinase                                        |
| SAG2141 | 660      | +              |               |              |       | +            | -    |              | DHH family protein                                             |
| SAG2147 | 234      | +              |               | +            |       | +            | +    |              | protein of unknown function/lipoprotein, putative              |
| SAG2148 | 179      | +              |               |              |       |              |      |              | LysM domain protein                                            |
| SAG2174 | 409      | +              |               |              |       |              |      |              | serine protease                                                |
| SAG0013 | 428      | +              |               |              |       | +            | -    |              | protein of unknown function                                    |

Candidate signal peptides and lipoprotein motifs were predicted with PSORT [Nakai, K. & Horton, P. (1999) *Trends Biochem. Sci.* **24**, 34-36] and other methods (see *Methods*). Sortase motifs (LPxTG) were detected by using the FINDPATTERNS program of the GCG Package [Devereux, J., Haeberli, P. & Smithies, O. (1984) *Nucleic Acids Res.* **12**, 387-395] and hidden Markov models. "Other" indicates proteins carrying other motifs (e.g., integrin-binding motif RGD) or that are similar to characterized surface-exposed proteins. Western blot results were considered positive when the antibodies revealed a predominant band of the expected molecular weight on the total protein extracts of *S. agalactiae* strain 2603 V/R. ORFs without + or - in this column were not tested in Western blot. FACS analyses were performed for Western blot-positive proteins only. Western blot and FACS data are displayed only for proteins carrying at least one of the other motifs shown in the table. Column "GBS specific" indicates genes unique to *S. agalactiae* (when compared to other completely sequenced genomes) that are present in all the *S. agalactiae* strains tested in comparative genome hybridization analyses. Finally, only proteins carrying fewer than three predicted transmembrane domains are shown in the table; other proteins are likely to be embedded in the cytoplasmic membrane and are probably not exposed on the organism's surface.
