# Supplementary material
Source: PubMed Central journal article supplement (PMC129455)
Supplement: pnas_182380799_4.pdf [file pnas_182380799_4.pdf]

**Table 3. *Streptococcus*-specific genes**

| ORF     | Annotation                                   |
|---------|----------------------------------------------|
| SAG0038 | Conserved hypothetical protein               |
| SAG0048 | Transcriptional regulator Cro/CI family      |
| SAG0091 | Transcriptional regulator ComX1 putative     |
| SAG0137 | Conserved hypothetical protein               |
| SAG0686 | DNA-entry nuclease putative                  |
| SAG0770 | Membrane protein putative                    |
| SAG0868 | DNA-entry nuclease                           |
| SAG1143 | Conserved hypothetical protein               |
| SAG1233 | Streptococcal histidine triad family protein |
| SAG1596 | Integrase/recombinase phage integrase family |
| SAG1616 | Conserved hypothetical protein               |
| SAG1721 | Conserved hypothetical protein               |

The protein sets of *S. agalactiae*, *S. pneumoniae*, and *S. pyogenes* were compared by using FASTA3 [Pearson, W. R. (2000) *Methods Mol. Biol.* **132**, 185-219]. Shared genes were defined by using a FASTA3 *P* value cutoff of  $10^{-15}$ . These shared genes and genes that *S. agalactiae* did not share with the other streptococci using this cutoff were subsequently searched against all completely sequenced genomes, and genes were defined as unique to streptococci or *S. agalactiae* when they did not share similarity with any other gene sets with a FASTA3 *P* value of  $10^{-5}$  or lower.
