# Supplementary material
Source: PubMed Central journal article supplement (PMC129455)
Supplement: pnas_182380799_5.pdf [file pnas_182380799_5.pdf]

**Table 4. Probable recently duplicated genes**

SAG0148 oligopeptide ABC transporter, substrate-binding protein, putative; SAG0979 ABC transporter, substrate-binding protein.  
SAG0151 oligopeptide ABC transporter, ATP-binding protein; SAG1515 peptide ABC transporter, ATP-binding protein.  
SAG0195 IS1548, transposase; SAG0693 IS1548, transposase; SAG0760 IS1548, transposase; SAG0945 IS1548, transposase; SAG1584 IS1548, transposase; SAG1619 IS1548, transposase.  
SAG0230 conserved hypothetical protein; SAG1039 conserved hypothetical protein  
SAG0233 hypothetical protein; SAG1785 hypothetical protein.  
SAG0261 IS1381, transposase OrfB; SAG0542 IS1381, transposase OrfA; SAG0543 IS1381, transposase OrfB; SAG0966 IS1381, transposase OrfB; SAG1457 IS1381, transposase OrfB; SAG1550 IS1381, transposase OrfB; SAG2002 IS1381, transposase OrfB.  
SAG0262 IS1381, transposase OrfA; SAG0965 IS1381, transposase OrfA; SAG1549 IS1381, transposase OrfA; SAG1458 IS1381, transposase OrfA; SAG2003 IS1381, transposase OrfA.  
SAG0383 protein of unknown function/lipoprotein, putative; SAG0785 conserved hypothetical protein.  
SAG0405 protein of unknown function/lipoprotein, putative; SAG0954 protein of unknown function/lipoprotein, putative.  
SAG0417 glycosyl transferase, group 2 family protein; SAG1422 glycosyl transferase, group 2 family protein.  
SAG0429 oxidoreductase, aldo/keto reductase family; SAG1476 oxidoreductase, aldo/keto reductase family.  
SAG0432 transcriptional regulator, AraC family; SAG0644 transcriptional regulator, AraC family.  
SAG0434 transposase, IS256 family, truncation; SAG0448 transposase, IS256 family.  
SAG0438 bacteriophage L54a, integrase, truncation; SAG1986 site-specific recombinase, phage integrase family; SAG1989 hypothetical protein; SAG1993 site-specific recombinase, phage integrase family; SAG2115 hypothetical protein.  
SAG0442 acetyltransferase, GNAT family; SAG0443 acetyltransferase, GNAT family  
SAG0447 magnesium transporter, CorA family; SAG0875 magnesium transporter, CorA family, putative.  
SAG0508  $\beta$ -lactam resistance factor; SAG1349  $\beta$ -lactam resistance factor.  
SAG0566 prophage LambdaSa1, single-strand binding protein; SAG1713 single-strand binding protein; SAG1863 prophage LambdaSa2, single-strand binding protein.  
SAG0603 conserved hypothetical protein; SAG1838 prophage LambdaSa2, holin, putative.  
SAG0604 prophage LambdaSa1, lysin, putative; SAG1837 prophage LambdaSa2, lysin, putative.

SAG0618 transposase OrfB, IS3 family, truncation; SAG0639 transposase OrfB, IS3 family; SAG1232 transposase OrfB, IS3 family, truncation; SAG1242 transposase OrfB, IS3 family, truncation.

SAG0640 transposase OrfA, IS3 family; SAG1241 transposase OrfA, IS3 family.

SAG0646 cell wall surface anchor family protein; SAG1404 cell wall surface anchor family protein.

SAG0647 sortase family protein; SAG0648 sortase family protein; SAG0650 sortase family protein.

SAG0649 cell wall surface anchor family protein, putative; SAG1408 cell wall surface anchor family protein.

SAG0676 proteinase, putative; SAG2053 serine protease, subtilase family, putative.

SAG0679 protein of unknown function; SAG0680 protein of unknown function; SAG0681 conserved domain protein.

SAG1002 protease, putative; SAG1465 protease, putative.

SAG1025 hypothetical protein; SAG1033 FtsK/SpoIIIE family protein.

SAG1067 IS861, transposase OrfA; SAG1526 IS861, transposase OrfA.

SAG1068 IS861, transposase OrfB; SAG1256 IS861, transposase OrfB, truncation; SAG1527 IS861, transposase OrfB.

SAG1140 conserved hypothetical protein; SAG1141 conserved hypothetical protein.

SAG1164 glycosyl transferase CpsJ(V); SAG1165 glycosyl transferase CpsO(V).

SAG1182 phosphopentomutase; SAG2069 phosphopentomutase.

SAG1225 conserved hypothetical protein; SAG1540 conserved hypothetical protein.

SAG1228 ISSdy1, transposase OrfA; SAG1243 ISSdy1, transposase OrfA.

SAG1229 ISSdy1, transposase OrfB; SAG1244 ISSdy1, transposase OrfB.

SAG1253 transposase, ISL3 family; SAG2022 transposase, ISL3 family.

SAG1254 mercuric reductase; SAG2023 mercuric reductase.

SAG1255 mercuric resistance operon regulatory protein MerR; SAG2024 mercuric resistance operon regulatory protein MerR.

SAG1259 conserved hypothetical protein; SAG1272 conserved hypothetical protein.

SAG1283 agglutinin receptor; SAG2021 cell wall surface anchor family protein.

SAG1297 C-5 cytosine-specific DNA methylase; SAG1869 prophage LambdaSa2, type II DNA modification methyltransferase, putative.

SAG1405 sortase family protein; SAG1406 sortase family protein.

SAG1414 glycosyl transferase, group 2 family protein; SAG1415 glycosyl transferase, group 2 family protein.

SAG1456 glycosyl transferase, family 8, degenerate; SAG2060 glycosyl transferase, family 8.

SAG1521 transposase, IS30 family, putative; SAG1576 transposase, IS30 family, putative, truncation; SAG1795 transposase, IS30 family, putative.

SAG1655 transcriptional regulator, MerR family; SAG1972 transcriptional regulator, MerR family.

SAG1979 membrane protein, putative; SAG2034 membrane protein, putative.

SAG1980 ABC transporter, ATP-binding protein; SAG2035 ABC transporter, ATP-binding protein.

SAG1982 transcriptional regulator, Cro/CI family; SAG2037 transcriptional regulator, Cro/CI family.

SAG1983 conserved hypothetical protein; SAG2039 conserved hypothetical protein.  
SAG1984 conserved hypothetical protein TIGR00730; SAG2040 conserved hypothetical  
protein TIGR00730.  
SAG1988 conserved hypothetical protein; SAG2114 conserved hypothetical protein.

Probable recently duplicated genes are indicated on the same line and are separated by a semicolon.
