# Supplementary material
Source: PubMed Central journal article supplement (PMC129455)
Supplement: pnas_182380799_6.pdf [file pnas_182380799_6.pdf]

**Table 5. *S. agalactiae* strains used for comparative genome hybridizations and phylogenetic analyses**

| Strain     | Source     | Capsular serotype | Reference  |
|------------|------------|-------------------|------------|
| 090        | Lancefield | Ia                |            |
| 515        | Houston    | Ia                | 1          |
| A909       | Lancefield | Ia                | 2          |
| Davis      | Channing   | Ia                |            |
| DK1        | Houston    | Ia                |            |
| DK8        | Houston    | Ia                |            |
| H36b       | Lancefield | Ib                | 2          |
| (S7) 7357b | Channing   | Ib                | 3          |
| 18RS21     | Lancefield | II                | 4          |
| DK21       | Houston    | II                |            |
| COH1       | Seattle    | III               | 5          |
| COH31      | Seattle    | III               | 6          |
| D136C      | Lancefield | III               | 4          |
| M781       | Houston    | III               | 7          |
| M732       | Houston    | III               | 8          |
| 1169NT1    | Atlanta    | V                 | 9          |
| 2603V/R    | Italy      | V                 | This study |
| CJB111     | Houston    | V                 | 10         |
| JM9130013  | Japan      | VIII              | 11         |
| SMU014     | Japan      | VIII              | 11         |
| CJB110     | Houston    | Nontypeable       | 12         |

1. Wessels, M. R., Paoletti, L. C., Rodewald, A. K., Michon, F., DiFabio, J., Jennings, H. J. & Kasper, D. L. (1993) *Infect. Immun.* **61**, 4760–4766.

2. Wilkinson, H. W. & Eagon, R. G. (1971) *Infect. Immun.* **4**, 596–604.

3. Madoff, L. C., Michel, J. L., Gong, E. W., Rodewald, A. K. & Kasper, D. L. (1992) *Infect. Immun.* **60**, 4989–4994.

4. Lancefield, R. C. (1975) in *New Approaches for Inducing Natural Immunity to Pyogenic Organisms*, ed. Robbins, J. E. A. (Natl. Inst. Health, Bethesda, MD), pp. 145–151.

5. Wessels, M. R., Benedi, V.-J., Kasper, D. L., Heggen, L. M. & Rubens, C. E. (1991) in *Genetics and Molecular Biology of Streptococci, Lactococci, and Enterococci*, eds.

Dunny, G. M., Cleary, P. P. & McKay, L. L. (Am. Soc. Microbiol., Washington, DC), pp. 219–223.

6. Rubens, C. E., Wessels, M. R., Heggen, L. M. & Kasper, D. L. (1987) *Proc. Natl. Acad. Sci. USA* **84**, 7208–7212.

7. Wessels, M. R., Paoletti, L. C., Kasper, D. L., DiFabio, J. L., Michon, F., Holme, K. & Jennings, H. J. (1990) *J. Clin. Invest.* **86**, 1428–1433.

8. Edwards, M. S., Wessels, M. R. & Baker, C. J. (1993) *Infect. Immun.* **61**, 2866–2871.

9. Wilkinson, H. W. (1977) *J. Clin. Microbiol.* **6**, 183–184.

10. Wessels, M. R., Paoletti, L. C., Pinel, J. & Kasper, D. L. (1995) *J. Infect. Dis.* **171**, 879–884.

11. Lachenauer, C. S., Kasper, D. L., Shimada, J., Iciman, Y., Ohtsuka, H., Kaku, M., Paoletti, L. C. & Madoff, L. C. (1997) in *ICAAC*, pp. K–80.

12. Lachenauer, C. S., Creti, R., Michel, J. L. & Madoff, L. C. (2000) *Proc. Natl. Acad. Sci. USA* **97**, 9630–9635.
