# Supplementary material
Source: PubMed Central journal article supplement (PMC129455)
Supplement: pnas_182380799_9.pdf [file pnas_182380799_9.pdf]

**Table 7. Genes and strains used for phylogenetic analyses of *S. agalactiae* strains**

| <b>Locus</b>    | <b>Annotation</b>                                  |
|-----------------|----------------------------------------------------|
| Housekeeping    |                                                    |
| SAG0466         | thiolase                                           |
| SAG0471         | glucokinase                                        |
| SAG0492         | amino acid ABC transporter, ATP-binding protein    |
| SAG0767         | D-alanine–D-alanine ligase                         |
| SAG1086         | xanthine phosphoribosyltransferase                 |
| SAG1600         | glutamate racemase                                 |
| SAG1680         | shikimate 5-dehydrogenase                          |
| SAG1723         | signal peptidase I                                 |
| Surface-exposed |                                                    |
| SAG0079         | adenylate kinase                                   |
| SAG0093         | D-alanyl–D-alanine carboxypeptidase family protein |
| SAG0163         | competence protein CglA                            |
| SAG0290         | ABC transporter, substrate-binding protein         |
| SAG0368         | protein of unknown function                        |
| SAG0503         | lipase/acylhydrolase                               |
| SAG1473         | cell wall surface anchor family protein            |

| <b>Locus</b> | <b>Annotation</b>                                 |
|--------------|---------------------------------------------------|
| SAG1552      | conserved hypothetical protein                    |
| SAG1641      | YaeC family protein                               |
| SAG2147      | protein of unknown function/lipoprotein, putative |
| SAG2148      | LysM domain protein                               |

The nucleotide sequence of the 19 genes listed was determined after PCR amplification from each of 11 *S. agalactiae* strains. The gene set comprised eight housekeeping genes and 11 genes coding for proteins predicted to be exposed on the surface of the bacteria. The strains were the following: type Ia, 090 and A909; type Ib, H36B; type II, 18RS21; type III, COH1, M732 and M781; type V, 2603 V/R and 1169NT1; type VIII, JM9130013; and nontypeable strain CJB110. The gene sequences were used for phylogenetic analyses (Fig. 3).
