# Supplementary material
Source: PubMed Central journal article supplement (PMC129455)
Supplement: pnas_182380799_11.pdf [file pnas_182380799_11.pdf]

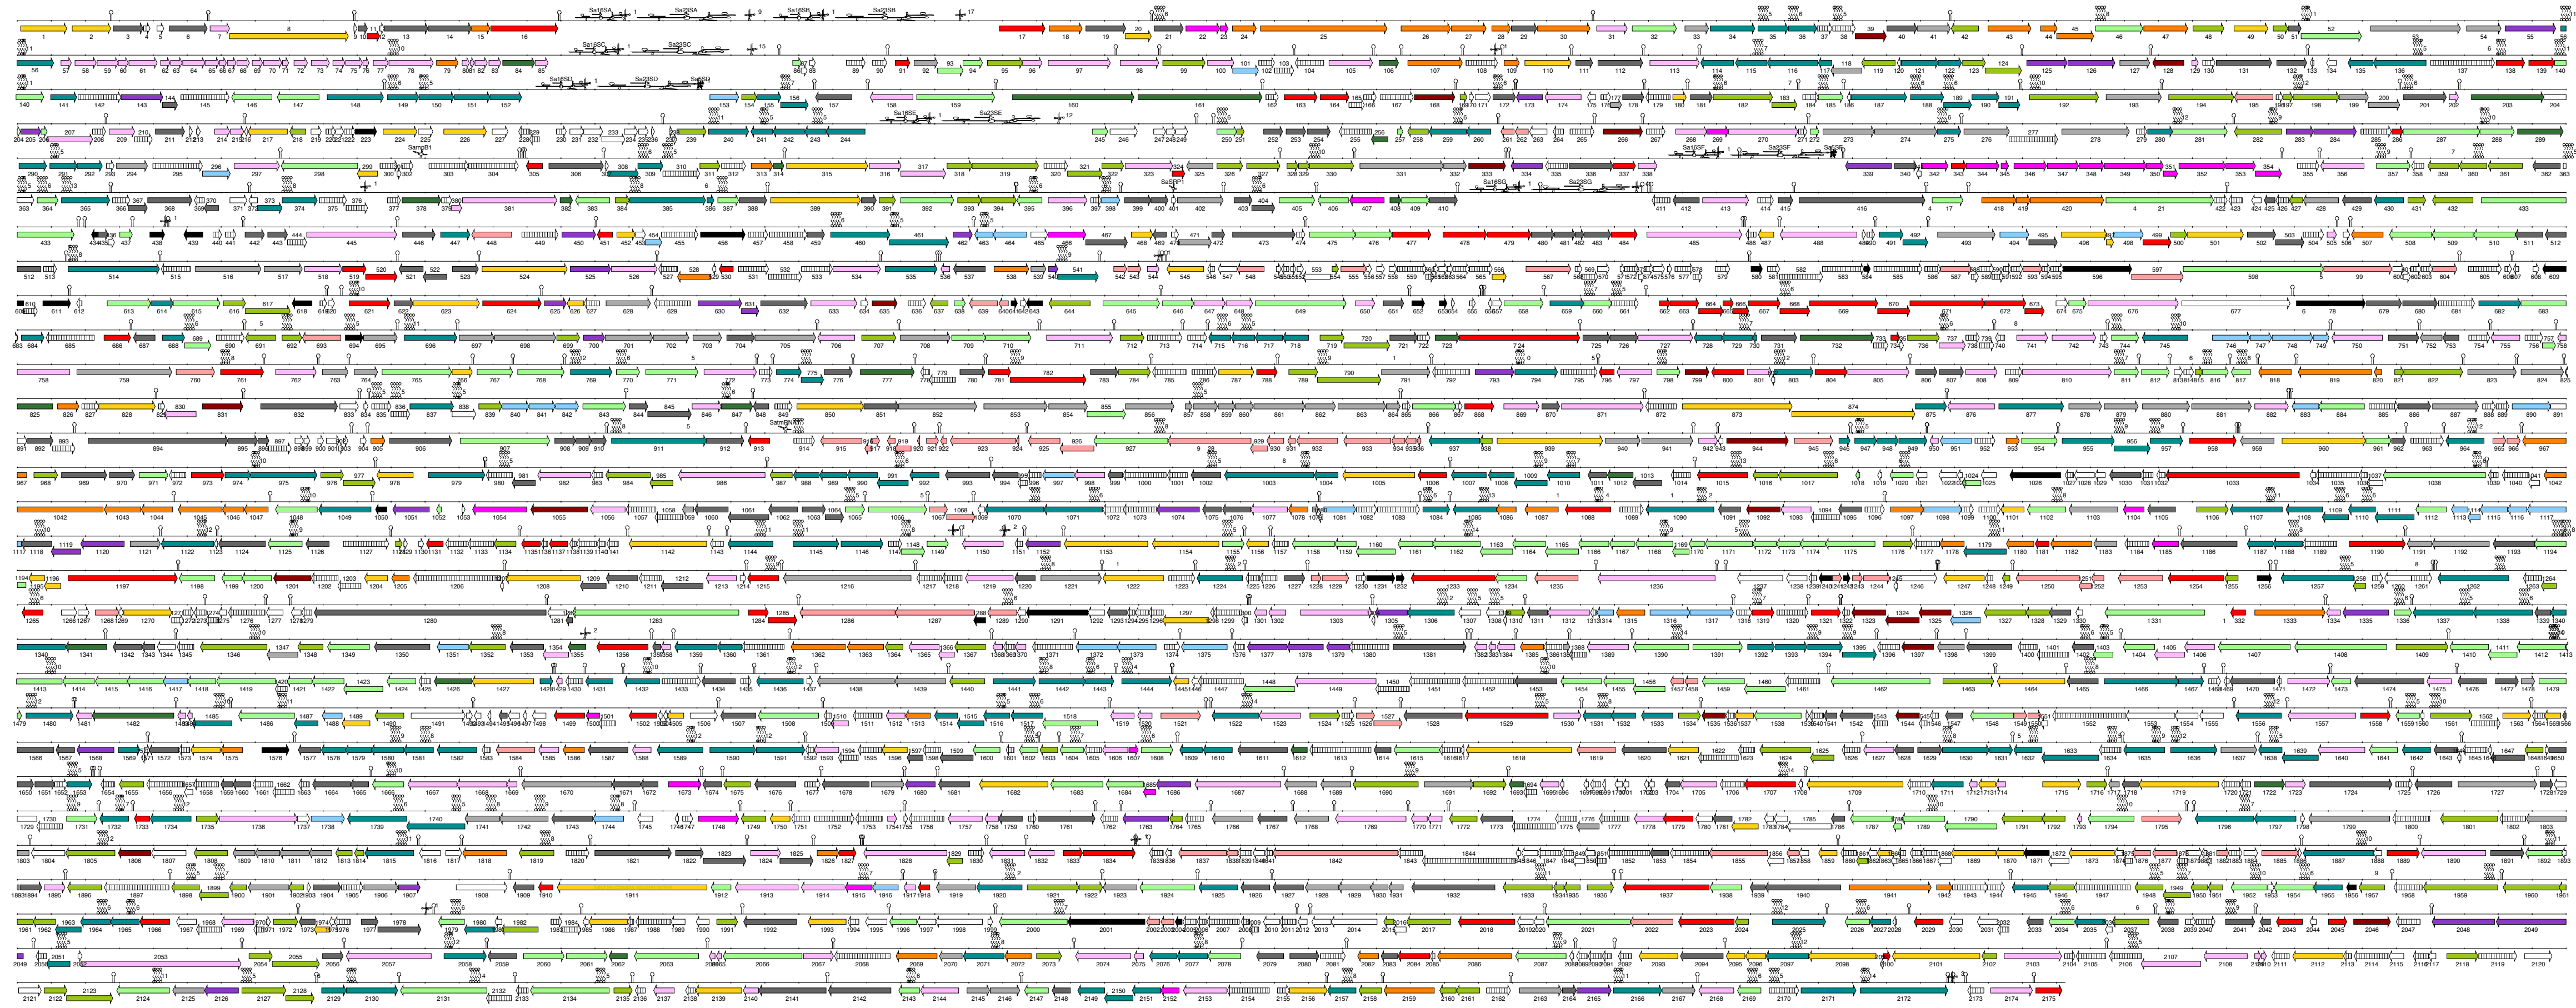

- |                                                            |                                 |                                        |                                                    |                                |                                 |
|------------------------------------------------------------|---------------------------------|----------------------------------------|----------------------------------------------------|--------------------------------|---------------------------------|
| Amino acid biosynthesis                                    | Cellular processes              | Energy metabolism                      | Purines, pyrimidines, nucleosides, and nucleotides | Transport and binding proteins | Conserved hypothetical proteins |
| Biosynthesis of cofactors, prosthetic groups, and carriers | Central intermediary metabolism | Fatty acid and phospholipid metabolism | Regulatory functions and signal transduction       | Other categories               | Hypothetical proteins           |
| Cell envelope                                              | DNA metabolism                  | Protein synthesis and fate             | Transcription                                      | Unknown function               | Disrupted reading frame         |
